# Supplementary material for: Integrated Comparative Transcriptome and circRNA-lncRNA-miRNA-mRNA ceRNA Regulatory Network Analyses Identify Molecular Mechanisms Associated with Intramuscular Fat Content in Beef Cattle
Source: MDPI journal article supplement (doi:10.3390/ani13162598), 2023-08-11
Supplement: s1 [file s1]

**Table S6.** Information about differentially expressed types of RNAs and their interactions in subnets of ceRNA regulatory network between eight pairwise comparative groups associated with IMF in beef cattle breeds.

| Subnets       | Important Interactions |                                                             |                 |                                                                                                                                                                                                       | Types of Hub RNAs                                    |                            |                            |
|---------------|------------------------|-------------------------------------------------------------|-----------------|-------------------------------------------------------------------------------------------------------------------------------------------------------------------------------------------------------|------------------------------------------------------|----------------------------|----------------------------|
|               |                        |                                                             |                 |                                                                                                                                                                                                       | mRNAs                                                | miRNAs                     | lncRNAs                    |
|               |                        |                                                             |                 |                                                                                                                                                                                                       | Down/Up Regulation<br>(↓↑)                           | Down/Up Regulation<br>(↓↑) | Down/Up Regulation<br>(↓↑) |
| 1             | mRNA-miRNA             | bta-miR-1-2                                                 | Suppressed      | UTRN, ACTB, ASH1L, NRP1, THBS1                                                                                                                                                                        | (↓)<br>UTRN, ATP2A2, CTNND1, MYOZ1, CKM, LMOD2, BAG3 | (↓)<br>bta-miR-1-2         | (NA)<br>MSTRG.10337        |
|               | mRNA-lncRNA            | LOC512486                                                   | Interacted with | IRF1                                                                                                                                                                                                  |                                                      |                            |                            |
|               |                        | MSTRG.2819                                                  | Interacted with | MYPN                                                                                                                                                                                                  |                                                      |                            |                            |
|               |                        | MSTRG.10337                                                 | Interacted with | RYR1, CASQ1, MYBPC1, TNNT1, CACNA1S, CKM, LMOD2, CORO6, MB, MYOM2, LDB3                                                                                                                               |                                                      |                            |                            |
|               | lncRNA-lncRNA          | MSTRG.10337                                                 | Interacted with | MSTRG.2819, MSTRG.5283, MSTRG.8140, MSTRG.8974, MSTRG.8142, MSTRG.7965                                                                                                                                | (↑)<br>EHBP1L1                                       |                            |                            |
| 2             | mRNA-miRNA             | bta-miR-1-2                                                 | Suppressed      | UTRN, THBS1, ASH1L HNRNPA1, NRP1, ACTB, FN1                                                                                                                                                           | (↓)<br>UTRN, MYOZ1, RYR1, LMOD2, CKM                 | (↓)<br>bta-miR-1-2         | (NA)<br>MSTRG.10337        |
|               |                        | bta-miR-133a-1, bta-miR-133a-2                              | Suppressed      | MSN                                                                                                                                                                                                   |                                                      |                            |                            |
|               | mRNA-lncRNA            | MSTRG.10337                                                 | Interacted with | LMOD2, MYOM2, LDB3, RYR1, NEB, MYBPC1, TNNC2, MYL2, CORO6, CKM, MB, TNNT1, FBXO40                                                                                                                     |                                                      |                            |                            |
|               |                        | LOC526226, LOC101903367, LOC112444238, LOC525506, LOC525506 | Interacted with | MEF2C, IGF2                                                                                                                                                                                           |                                                      |                            |                            |
|               |                        | BIANCR                                                      | Interacted with | S100B, HSPA1A, ACTR3B, HADHB                                                                                                                                                                          |                                                      |                            |                            |
|               | 3                      | mRNA-miRNA                                                  | bta-miR-1-2     | Suppressed                                                                                                                                                                                            | UTRN, THBS1, ASH1L HNRNPA1, NRP1, ACTB, FN1          |                            |                            |
| bta-miR-95    |                        |                                                             | Suppressed      | ACACB, ENAH, IPO5, XPO4, LPIN1                                                                                                                                                                        |                                                      |                            |                            |
| bta-miR-365-1 |                        |                                                             | Suppressed      | PTGFRN, CCNG1, ASH1L, BRWD1, SARS, UBR3, YWHAG, CLUH, PKIA, EIF4EBP2, HSPB8, NOTCH3, ADCY9, VAPA, ATP1A2, IPO5, ENAH, CD180, ACACB, EHD3, ARHGAP35, PPP1R2, BCL2L13, CD38, CD74, TAL1, ACP5, DST, APC |                                                      |                            |                            |
| mRNA-lncRNA   |                        | BIANCR                                                      | Interacted with | ACTR3B, MAP3K11, NDRG2, LPIN1                                                                                                                                                                         | (↑)<br>EHBP1L1                                       |                            |                            |

|   |               |                                                                                                                                                                                                                                                                                                                                                                                                                                                                                                                                                          |                 |                                                                                                                                                                                                        |                                                                                           |                                               |                        |
|---|---------------|----------------------------------------------------------------------------------------------------------------------------------------------------------------------------------------------------------------------------------------------------------------------------------------------------------------------------------------------------------------------------------------------------------------------------------------------------------------------------------------------------------------------------------------------------------|-----------------|--------------------------------------------------------------------------------------------------------------------------------------------------------------------------------------------------------|-------------------------------------------------------------------------------------------|-----------------------------------------------|------------------------|
| 4 | mRNA-miRNA    | bta-miR-133a-2,<br>bta-miR-133a-1                                                                                                                                                                                                                                                                                                                                                                                                                                                                                                                        | Suppressed      | ASH1L, XPO4                                                                                                                                                                                            | <p>(↓)<br/>GLUL,<br/>BRWD1,<br/>ASH1L,<br/>VAPS13D,<br/>BIRC6,<br/>VAPS13C,<br/>WDFY3</p> |                                               |                        |
|   |               | bta-miR-95                                                                                                                                                                                                                                                                                                                                                                                                                                                                                                                                               | Suppressed      | IPO5, ABLIM1                                                                                                                                                                                           |                                                                                           |                                               |                        |
|   |               | bta-miR-1-2                                                                                                                                                                                                                                                                                                                                                                                                                                                                                                                                              | Suppressed      | KCNJ2, HIPK3                                                                                                                                                                                           |                                                                                           |                                               |                        |
|   |               | bta-miR-378d                                                                                                                                                                                                                                                                                                                                                                                                                                                                                                                                             | Suppressed      | CYB5R1, FYTDD1,<br>AFF1, FXR1,<br>NCKAP1, CLUH,<br>MORF4L2, CHTA,<br>PDE4D, VAPA,<br>RTN2, MAPRE3,<br>HIPK3, KCNJ2,<br>PRR5L,<br>TMEM151A,<br>WARS, SDS,<br>CLIC5, GSTM4,<br>DPYSL3, DPYSL3,<br>FBXO40 |                                                                                           |                                               |                        |
|   |               | bta-miR-1296                                                                                                                                                                                                                                                                                                                                                                                                                                                                                                                                             | Suppressed      | TNNI1, C3,<br>ABLIM1, WNK1,<br>ADCY9, ZNF106,<br>VPS13C, PKIA,<br>CARM1,<br>EIF4EBP2, AOC3                                                                                                             |                                                                                           |                                               |                        |
|   | mRNA-circRNA  | circRNA5689,<br>circRNA5807,<br>circRNA5797,<br>circRNA5755                                                                                                                                                                                                                                                                                                                                                                                                                                                                                              | Interacted with | GLUL                                                                                                                                                                                                   |                                                                                           |                                               |                        |
|   | mRNA-lncRNA   | MSTRG.3939.1,<br>MSTRG.21819.1,<br>MSTRG.3767.1,<br>MSTRG.20646.1,<br>MSTRG.20716.2,<br>MSTRG.19454.1,<br>MSTRG.7800.1,<br>MSTRG.14115.1,<br>MSTRG.10285.2,<br>MSTRG.19644.1,<br>MSTRG.5117.1,<br>MSTRG.5458.1,<br>MSTRG.11792.1,<br>MSTRG.16187.2,<br>MSTRG.10293.1,<br>MSTRG.10451.1,<br>MSTRG.18715.1,<br>MSTRG.16614.1,<br>MSTRG.22368.1,<br>MSTRG.6618.1,<br>MSTRG.20293.2,<br>MSTRG.22366.1,<br>MSTRG.7874.1,<br>MSTRG.12913.1,<br>MSTRG.20966.1,<br>MSTRG.22369.1,<br>MSTRG.9461.1,<br>MSTRG.16045.1,<br>MSTRG.8171.1,<br>MSTRG.7718.1,<br>BIANCR | Interacted with | GLUL                                                                                                                                                                                                   |                                                                                           |                                               |                        |
|   |               | BIANCR                                                                                                                                                                                                                                                                                                                                                                                                                                                                                                                                                   | Interacted with | S100B                                                                                                                                                                                                  |                                                                                           |                                               |                        |
|   | miRNA-circRNA | bta_circ_0004158,<br>bta_circ_0006814,<br>bta_circ_0006815,<br>bta_circ_0006807,<br>bta_circ_0006152,<br>bta_circ_0008914,<br>bta_circ_0008835,<br>bta_circ_0006806,<br>bta_circ_0006813                                                                                                                                                                                                                                                                                                                                                                 | Interacted with | bta-miR-378d                                                                                                                                                                                           |                                                                                           |                                               |                        |
|   |               |                                                                                                                                                                                                                                                                                                                                                                                                                                                                                                                                                          |                 |                                                                                                                                                                                                        |                                                                                           | <p>(↓)<br/>bta-miR-1296,<br/>bta-miR-378d</p> | <p>(NA)<br/>BIANCR</p> |

|         |               |                                                            |                 |                                                                                                                                                                                                               |                                                                    |                     |   |
|---------|---------------|------------------------------------------------------------|-----------------|---------------------------------------------------------------------------------------------------------------------------------------------------------------------------------------------------------------|--------------------------------------------------------------------|---------------------|---|
|         |               | bta_circ_0006812,<br>bta_circ_0010653,<br>bta_circ_0003169 | Interacted with | bta-miR-1296                                                                                                                                                                                                  |                                                                    |                     |   |
| 5 and 6 | mRNA-miRNA    | bta-miR-133a-2,<br>bta-miR-133a-1,<br>bta-miR-1-2          | Suppressed      | ASH1L                                                                                                                                                                                                         | (↓)<br>BRWD1,<br>ASH1L,<br>VAPS13D,<br>BIRC6,<br>VAPS13C,<br>WDFY3 | (↓)<br>bta-miR-1296 | - |
|         |               | bta-miR-1296                                               | Suppressed      | CD180, ABLIM1,<br>RABEP1,<br>EIF4EBP2, TNNI1,<br>AOC3, C3, WNK1,<br>ADCY9, EHD3,<br>PKIA, CARM1,<br>ZNF106, CSDE1                                                                                             |                                                                    |                     |   |
|         | miRNA-circRNA | bta_circ_0010653,<br>bta_circ_0003169                      | Interacted with | bta-miR-1296                                                                                                                                                                                                  |                                                                    |                     |   |
| 7       | mRNA-miRNA    | bta-miR-378d                                               | Suppressed      | RTN2, DPYSL3,<br>PDE4D, KCNJ2,<br>CYB5R1, GSTM4,<br>FYTTD1, CLIC5,<br>MORF4L2, EHD3,<br>CD180, PRR5L,<br>TMEM151A,<br>CLUH, AFF1,<br>CIITA, VAPA                                                              | (↓)<br>RTN2                                                        | (↓)<br>bta-miR-378d | - |
|         | miRNA-circRNA | bta-miR-378d                                               | Interacted with | bta_circ_0006813,<br>bta_circ_0006814,<br>bta_circ_0008835,<br>bta_circ_0006815,<br>bta_circ_0004158,<br>bta_circ_0006812,<br>bta_circ_0006152,<br>bta_circ_0006807,<br>bta_circ_0006806,<br>bta_circ_0008914 |                                                                    |                     |   |
